## CORRECTION

# Correction: Retraction: Stiffening-Induced High Pulsatility Flow Activates Endothelial Inflammation via a TLR2/NF- $\kappa$ B Pathway

The *PLOS ONE* Staff

## Notice of republication

The following sentence was not included correctly in the original Notice of Retraction: “The authors provided some replication data in support of the results, but the original uncropped images underlying the published figures are no longer available.”

The publisher apologizes for the error. The Notice of Retraction was republished on August 1, 2019 to correct this error. Please download the notice again to view the correct version.

## References

1. Tan Y, Tseng P-O, Wang D, Zhang H, Hunter K, Hertzberg J, et al. (2014) Stiffening-Induced High Pulsatility Flow Activates Endothelial Inflammation via a TLR2/NF- $\kappa$ B Pathway. *PLoS ONE* 9(7): e102195. <https://doi.org/10.1371/journal.pone.0102195> PMID: 25029271
2. The *PLOS ONE* Editors (2019) Retraction: Stiffening-Induced High Pulsatility Flow Activates Endothelial Inflammation via a TLR2/NF- $\kappa$ B Pathway. *PLoS ONE* 14(7): e0220600. <https://doi.org/10.1371/journal.pone.0220600> PMID: 31356647

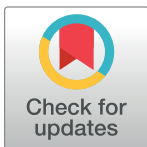

## OPEN ACCESS

**Citation:** The *PLOS ONE* Staff (2019) Correction: Retraction: Stiffening-Induced High Pulsatility Flow Activates Endothelial Inflammation via a TLR2/NF- $\kappa$ B Pathway. *PLoS ONE* 14(8): e0221184. <https://doi.org/10.1371/journal.pone.0221184>

**Published:** August 8, 2019

**Copyright:** © 2019 The PLOS ONE Staff. This is an open access article distributed under the terms of the [Creative Commons Attribution License](https://creativecommons.org/licenses/by/4.0/), which permits unrestricted use, distribution, and reproduction in any medium, provided the original author and source are credited.
